# Supplementary material
Source: ML conference proceedings conference paper supplement (https://openreview.net/forum?id=d8hYXbxX71)
Supplement: supplementary_material [file attachment]

## SUPPLEMENTARY MATERIAL: PROPORTIONAL RESOURCE ALLOCATION

**Anonymous authors**

Paper under double-blind review

In the main text of the paper, we restrict our attention to exactly one individual at each time step. Now we relax this restriction by considering policies as follows:

$$\begin{aligned} \text{proportional max-U: } a_i(t) &= \frac{e^{U_i(t)}}{\sum_{j=1}^N e^{U_j(t)}}, \\ \text{proportional min-U: } a_i(t) &= \frac{e^{-U_i(t)}}{\sum_{j=1}^N e^{-U_j(t)}}. \end{aligned}$$

**Theorem 1.** *Under regularity (Assumption 3) and modeling conditions (Assumption 2), and assume that  $f_i(x) \equiv f(x)$ ,  $g_i(x) \equiv g(x)$ , the proportional min-U policy leads to the following closed form solution of the individual rates of growth:*

$$R_i = \begin{cases} f^+, & i = J, \\ -g^+, & i \neq J, \end{cases} \quad a.s.$$

where  $J$  is a random variable with values in  $[N]$  whose exact value depends on  $U(0)$ ,  $f(\cdot)$ , and  $g(\cdot)$ .

*Proof of Theorem 2.* For  $\forall i, j \in [N]$  s.t.  $U_i(t) \geq U_j(t)$ , we have  $a_i(t) \geq a_j(t)$ , then under the assumption that  $f_i(x) \equiv f(x)$ ,  $g_i(x) \equiv g(x)$ , we further obtain

$$\begin{aligned} \mathbb{E}[Z_i(t+1)] &= a_i(t) \cdot f(U_i(t)) - (1 - a_i(t)) \cdot g(U_i(t)) \\ &\geq a_j(t) \cdot f(U_i(t)) - (1 - a_j(t)) \cdot g(U_i(t)) \\ &\geq a_j(t) \cdot f(U_j(t)) - (1 - a_j(t)) \cdot g(U_j(t)) = \mathbb{E}[Z_j(t+1)]. \end{aligned}$$

where the last inequality holds because of modeling conditions (Assumption 2.(a), (b)). Consider  $i \in \mathcal{M}_t$  where  $\mathcal{M}_t = \arg \max_j \{U_j(t)\}$  and  $i \in \mathcal{M}_t, j \in [N]$  such that  $U_i(t) - U_j(t) \geq 1$ , we have

$$\begin{aligned} &\mathbb{E}[U_i(t+1) - U_j(t+1) \mid \mathcal{F}_t] - (U_i(t) - U_j(t)) \\ &= \mathbb{E}[Z_i(t+1) - Z_j(t+1) \mid \mathcal{F}_t] \\ &= a_i(t) \cdot f(U_i(t)) - (1 - a_i(t)) \cdot g(U_i(t)) - (a_j(t) \cdot f(U_j(t)) - (1 - a_j(t)) \cdot g(U_j(t))) \\ &\geq a_i(t) \cdot f(U_i(t)) - (1 - a_i(t)) \cdot g(U_j(t)) - (a_j(t) \cdot f(U_i(t)) - (1 - a_j(t)) \cdot g(U_j(t))) \\ &= (a_i(t) - a_j(t)) \cdot f(U_i(t)) + (a_i(t) - a_j(t)) \cdot g(U_j(t)) \\ &\geq \frac{e^{M(t)} - e^{M(t)-1}}{\sum_{j \in [N]} e^{U_j(t)}} \cdot f^- + \frac{e^{M(t)} - e^{M(t)-1}}{\sum_{j \in [N]} e^{U_j(t)}} \cdot g^- \\ &\geq \frac{1 - e^{-1}}{N} (f^- + g^+) > 0. \end{aligned}$$

Now treat  $U_i(t) - U_j(t)$  as the welfare process and apply Lundberg inequality for welfare process (Lemma 3), we claim that with positive probability that  $U_i(t) - U_j(t) \geq 1$  for  $\forall t \geq 0$  when  $U_i(0) - U_j(0) \geq 1$  where  $i \in \mathcal{M}_0$ . Then combine with the regularity condition (Assumption 3.(c)), we have that with positive probability (lowerbounded by a constant) that  $U_i(t) - U_j(t) \geq 1$  for  $\forall t > 0$  where  $i \in \mathcal{M}_0$ . Then we apply the same reasoning for  $j \in [N] \setminus i$  and conclude that with probability 1, the proportional max-U policy will fixate on one single individual asymptotically.  $\square$

**Theorem 2.** *Under regularity (Assumption 3) and modeling conditions (Assumption 2.(a),(b)), the survival condition (Assumption 1), the proportional max-U policy leads to the following closed form solution of the individual rates of growth:*

$$R_i = \bar{\zeta}((f_1^+, \dots, f_N^+), (g_1^-, \dots, g_N^-)), \quad i = 1, \dots, N, \quad a.s.$$

054 *Proof of Theorem 1.* The result can be proved by induction, and the proof of long-term behavior of  
 055 min-U policy (Theorem 3) applies here with minor modifications. We assume for  $N - 1$  individuals  
 056 the conclusion holds, and consider  $\mathcal{M} := \arg \max_j \{U_j(0)\}$  and  $\mathcal{M}^c := [N] \setminus \mathcal{M}$ . For  $\forall l \in \mathcal{M}$ ,

$$057 a_l(t) \leq \frac{e^{-D(t)}}{1 + (N-1)e^{-D(t)}} \Rightarrow \sum_{i \in \mathcal{M}^c} a_i(t) \geq \frac{1}{1 + (N-1)e^{-D(t)}},$$

058 where  $D(t) = \max_{j \in [N]} U_j(t) - \min_{i \in [N]} U_i(t)$ . Hence there exists constant  $C$  such that when  
 059  $D(t) \geq C$ , the survival condition for  $\mathcal{M}^c$

$$\begin{aligned} 060 \bar{U}_{\mathcal{M}^c}(t+1) - \bar{U}_{\mathcal{M}^c}(t) &= \sum_{i \in \mathcal{M}^c} w_i^{\mathcal{M}^c} a_i(t) \cdot f_i(U_i(t)) - (1 - a_i(t)) \cdot g_i(U_i(t)) \\ 061 &\geq \sum_{i \in \mathcal{M}^c} w_i^{\mathcal{M}^c} a_i(t) \cdot f_i^- - (1 - a_i(t)) \cdot g_i^+ \\ 062 &= \left( \sum_{i \in \mathcal{M}^c} a_i(t) - \sum_{j \in \mathcal{M}^c} \frac{g_j^+}{f_j^- + g_j^+} \right) \cdot \left( \sum_{k \in \mathcal{M}^c} \frac{1}{f_k^- + g_k^+} \right)^{-1} \\ 063 &\geq \left( \frac{1}{1 + (N-1)e^{-C}} - \sum_{j \in \mathcal{M}^c} \frac{g_j^+}{f_j^- + g_j^+} \right) \cdot \left( \sum_{k \in \mathcal{M}^c} \frac{1}{f_k^- + g_k^+} \right)^{-1} > 0 \end{aligned}$$

064 where  $\bar{U}_{\mathcal{M}^c}(t)$ ,  $w_i^{\mathcal{M}^c}$  are defined as in equation (5) for set  $\mathcal{M}^c$ . Hence we apply the conclusion  
 065 for  $\mathcal{M}^c$  and claim that there exists constant  $T_{\mathcal{M}^c}$  such that when  $\sum_{i \in \mathcal{M}} a_i(t) \leq \frac{1}{1+(N-1)e^{-C}}$  for  
 066  $\forall t \geq 0$ , we have

$$\begin{aligned} 067 \mathbb{E} \left[ \min_{j \in \mathcal{M}^c} U_j(t) \right] &\geq \min_{j \in \mathcal{M}^c} + 1, \quad \forall t \geq T_{\mathcal{M}^c}, \\ 068 \mathbb{E} \left[ \max_{j \in \mathcal{M}^c} U_j(t) \right] &\leq \max_{j \in \mathcal{M}^c} - 1, \quad \forall t \geq T_{\mathcal{M}^c}. \end{aligned}$$

069 As for  $i \in \mathcal{M}$ ,

$$\begin{aligned} 070 \mathbb{E}[Z_i(t+1) \mid a_i(t), \mathcal{F}_t] &\leq a_i(t) f_i^+ - (1 - a_i(t)) g_i^- \\ 071 &\leq \frac{1}{N-1 + e^{-D(t)}} f_i^+ - \left( \frac{N-2 + e^{-D(t)}}{N-1 + e^{-D(t)}} \right) g_i^-, \end{aligned}$$

072 and when  $D(t) \geq C'$  for constant  $C' > 0$ , we have

$$073 \frac{1}{N-1 + e^{-D(t)}} f_i^+ - \left( \frac{N-2 + e^{-D(t)}}{N-1 + e^{-D(t)}} \right) g_i^- < -\frac{1}{2} \min_{i \in [N]} g_i^-. \quad (1)$$

074 Hence for the whole population  $[N]$ , if  $\sum_{i \in \mathcal{M}_t} a_i(t) \leq \min \left\{ \frac{1}{1+(N-1)e^{-C}}, \frac{1}{2} \min_{i \in [N]} \frac{g_i^-}{f_i^+ + g_i^-} \right\}$ ,  
 075 there exists constant  $T$  such that

$$\begin{aligned} 076 \mathbb{E} \left[ \min_{j \in \mathcal{M}^c} U_j(t) \right] &\geq \min_{j \in \mathcal{M}^c} U_j(0) + 1, \quad \forall t \geq T, \\ 077 \mathbb{E} \left[ \max_{j \in \mathcal{M}} U_j(t) \right] &\leq \max_{j \in \mathcal{M}} U_j(0) - 1, \quad \forall t \geq T. \end{aligned}$$

078 The rest of the proof goes through with minor modifications given the above facts and omitted  
 079 here.  $\square$
